# Supplementary material
Source: PubMed Central journal article supplement (PMC6951347)
Supplement: 41422_2019_244_MOESM1_ESM.pdf [file 41422_2019_244_MOESM1_ESM.pdf]

## Supplementary Information

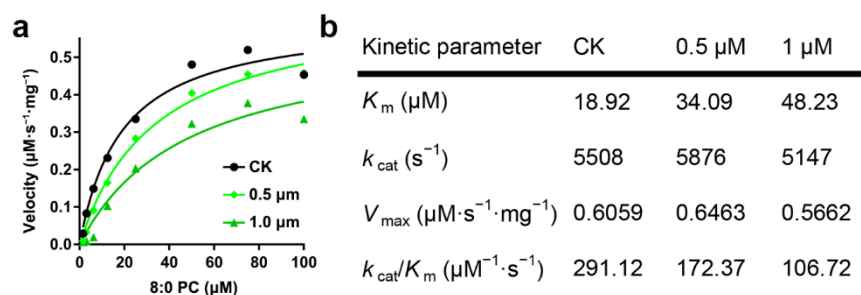

**Figure S1. *In vitro* kinetic assay to show the competitive inhibition of Bazedoxifene toward PLD $\alpha$ 1 (di8:0-PC as substrate). **a** Michaelis-Menten kinetics of PLD $\alpha$ 1 in the presence of different concentrations of Bazedoxifene, 0  $\mu\text{M}$  (CK, black), 0.5  $\mu\text{M}$  (green), and 1  $\mu\text{M}$  (olive). **b** The kinetic parameters were calculated and shown in the table. The experiments were repeated three times with similar results.**
