# Supplementary material
Source: PubMed Central journal article supplement (PMC6951347)
Supplement: 41422_2019_244_MOESM2_ESM.pdf [file 41422_2019_244_MOESM2_ESM.pdf]

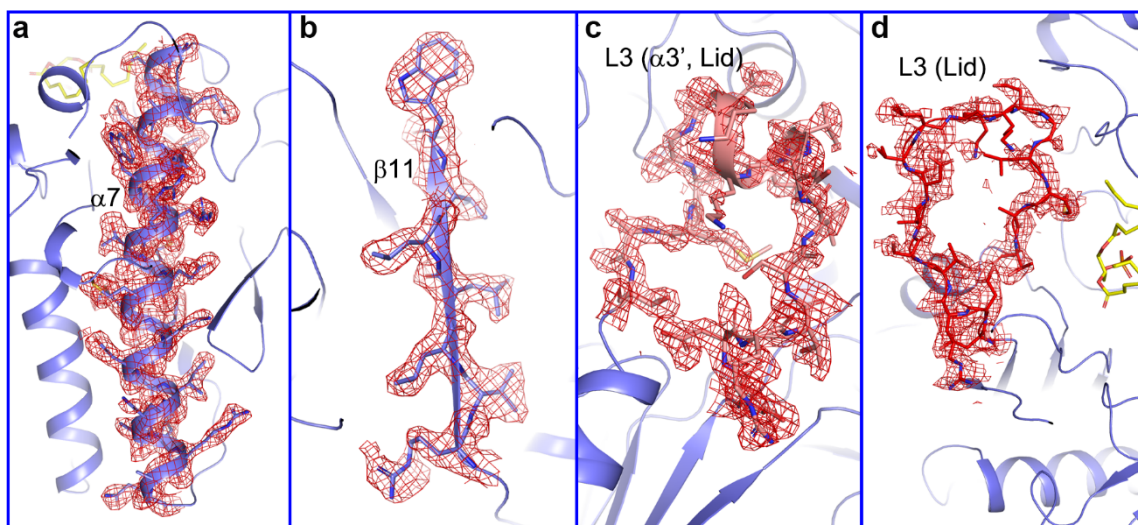

**Figure S2. Representative electron density of PLD $\alpha$ 1 contoured at  $1.0\sigma$  . a-c**

representative electron density of PLD $\alpha$ 1 in apo-form. **d** Electron density of L3 in PLD $\alpha$ 1-PA complex.
