# Supplementary material
Source: PubMed Central journal article supplement (PMC6951347)
Supplement: 41422_2019_244_MOESM5_ESM.pdf [file 41422_2019_244_MOESM5_ESM.pdf]

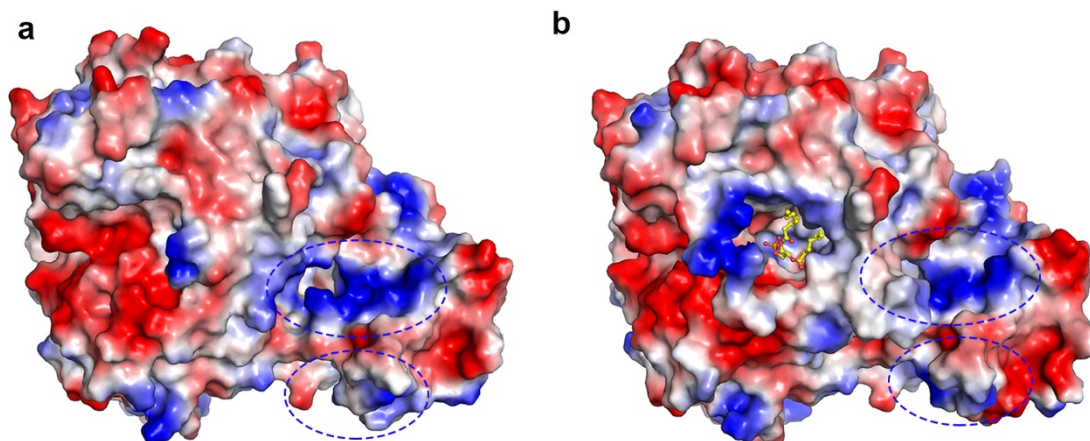

**Figure S5. Electron static surface model show the close and open conformation of the substrate-binding pocket. a** Close conformation of substrate-binding pocket in the apo-PLD $\alpha$ 1 structure. **b** Open conformation of substrate-binding pocket in the PLD $\alpha$ 1-PA complex structure. PA is shown with a stick model. The positive-charged patches are circled with dotted line. Red color and blue color indicate the negative and positive charges.
