# Supplementary material
Source: PubMed Central journal article supplement (PMC6951347)
Supplement: 41422_2019_244_MOESM6_ESM.pdf [file 41422_2019_244_MOESM6_ESM.pdf]

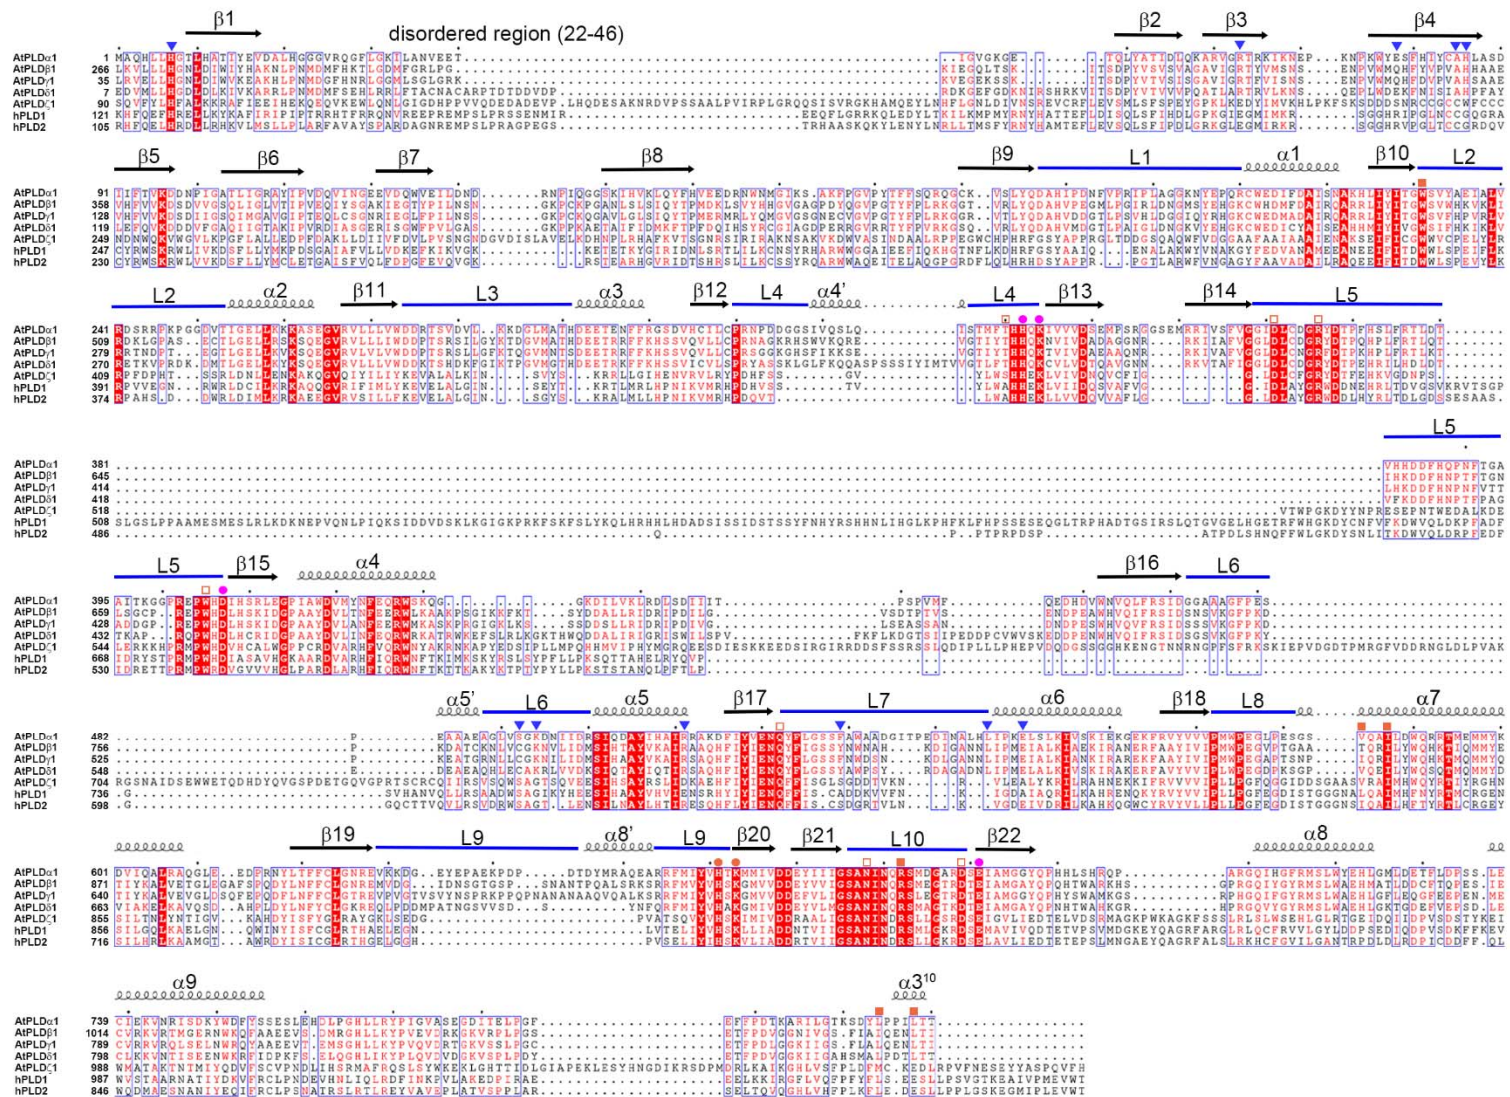

**Figure S6. Multiple sequence alignment of different PLDs.** AtPLD $\alpha$ 1, AtPLD $\beta$ 1, AtPLD $\gamma$ 1, and AtPLD $\delta$ 1 are C2-PLDs from *Arabidopsis*, AtPLD $\zeta$ 1, and hPLD1/2 are PX/PH-PLDs from *Arabidopsis* and human. The strictly conserved residues and red shaded, while the conserved residues are colored red. Secondary structure elements of PLD $\alpha$ 1 are place on top. The HKD1/2 motif residues are indicated with circles filled with magenta or orange color. Other residues constituting the active site or binding with PA are indicated with open or filled squares. The residues involving the C2/catalytic domain interaction surface are indicated with triangles filled with blue color.
