# Supplementary material
Source: PubMed Central journal article supplement (PMC6951347)
Supplement: 41422_2019_244_MOESM7_ESM.pdf [file 41422_2019_244_MOESM7_ESM.pdf]

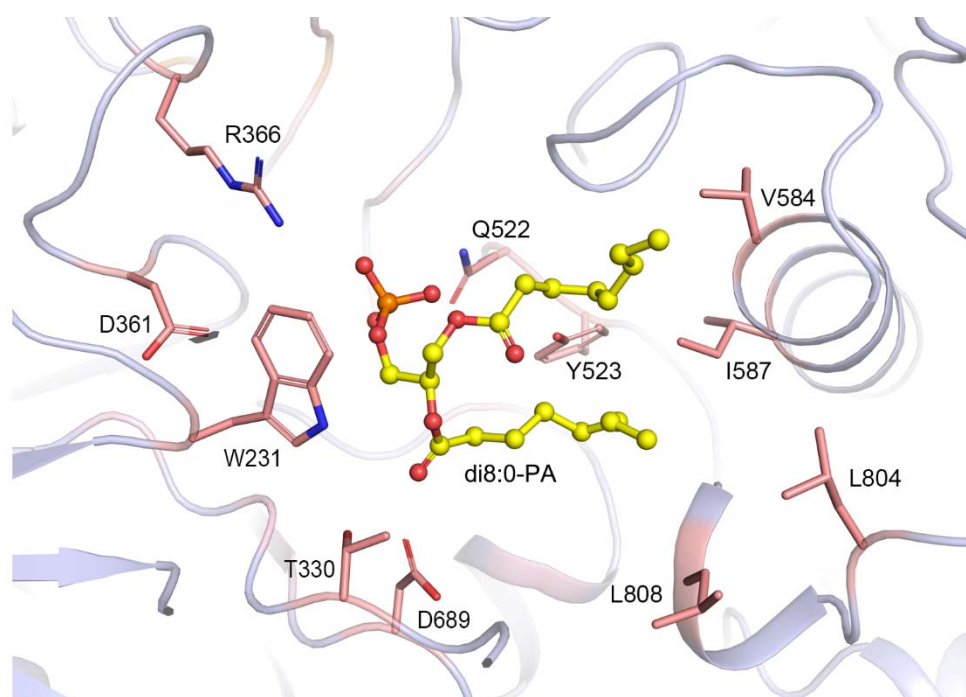

**Figure S7. Hydrophobic and hydrophilic interactions of PA with residues in the substrate-binding pocket.** PA and interaction residues are shown with stick models colored in yellow and pink, respectively.
