# Supplementary material
Source: PubMed Central journal article supplement (PMC6951347)
Supplement: 41422_2019_244_MOESM8_ESM.pdf [file 41422_2019_244_MOESM8_ESM.pdf]

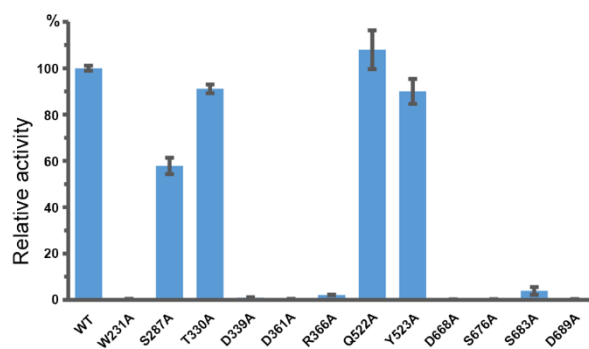

**Figure S8. Enzymatic activity of PLD $\alpha$ 1 mutation at the active site residues and Ca<sup>2+</sup> binding residues near the active site. Results are means  $\pm$  S.D., n=3.**
