# Supplementary material
Source: PubMed Central journal article supplement (PMC6951347)
Supplement: 41422_2019_244_MOESM9_ESM.pdf [file 41422_2019_244_MOESM9_ESM.pdf]

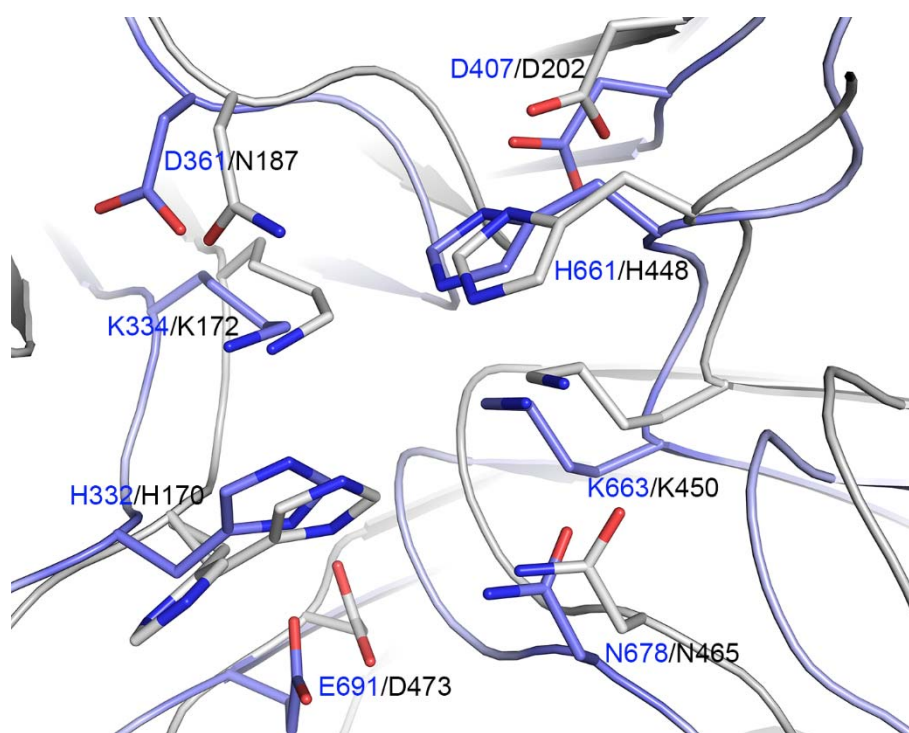

**Figure S9. Comparison of the active site residues in PLD $\alpha$ 1 and PLD<sub>PMF</sub> structures.**

Structures of PLD $\alpha$ 1 and PLD<sub>PMF</sub> are superimposed together, and residues constituting the active site of PLD $\alpha$ 1 and PLD<sub>PMF</sub> are shown with sticks and colored blue and gray, respectively.
