# Supplementary material
Source: PubMed Central journal article supplement (PMC6951347)
Supplement: 41422_2019_244_MOESM10_ESM.pdf [file 41422_2019_244_MOESM10_ESM.pdf]

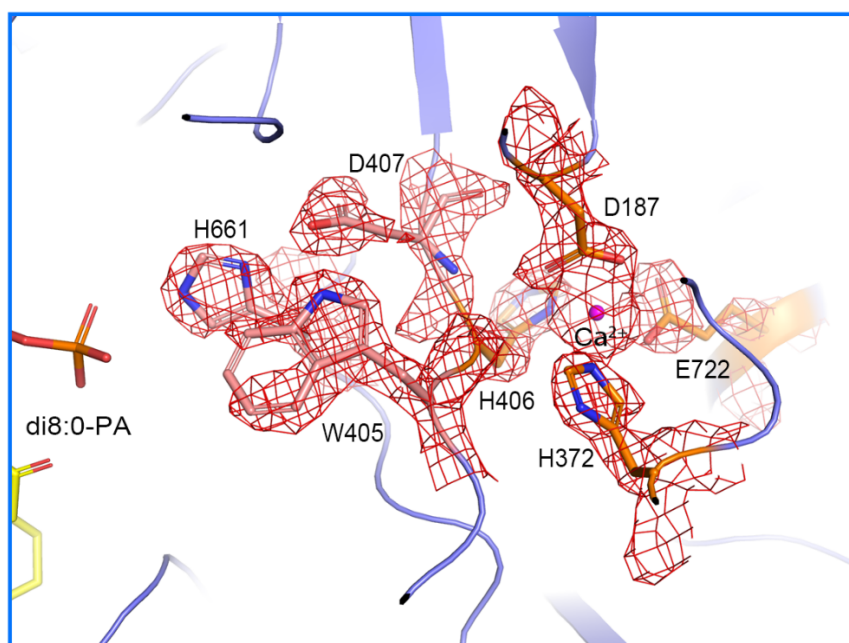

**Figure S10. Electron density of Ca<sup>2+</sup> binding site and coordinating residues near the active site. (Contoured at 1.5σ)**
