# Supplementary material
Source: PubMed Central journal article supplement (PMC6951347)
Supplement: 41422_2019_244_MOESM11_ESM.pdf [file 41422_2019_244_MOESM11_ESM.pdf]

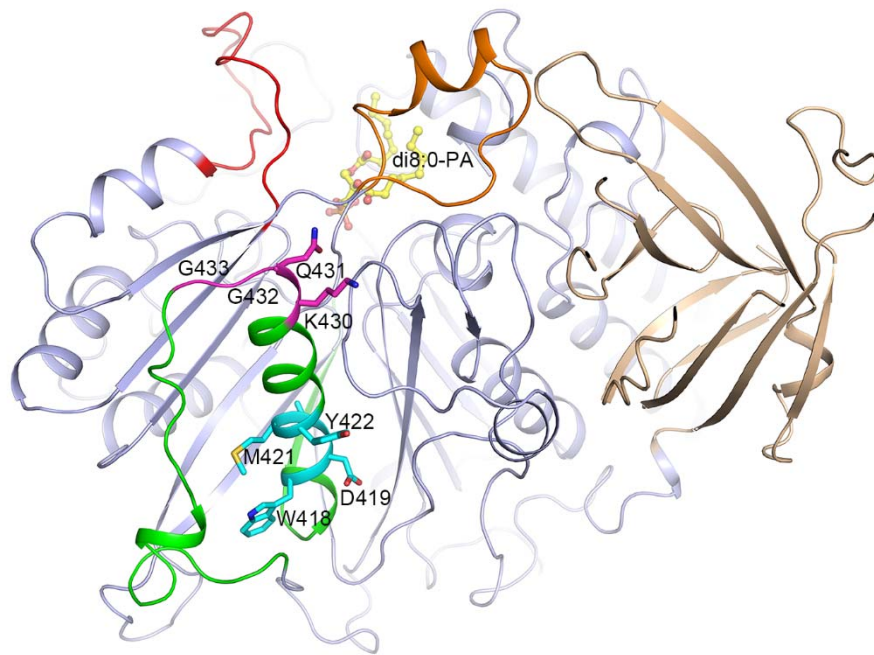

**Figure S11. Possible binding site of phosphoinositide.** The proposed phosphoinositide binding motifs- “RX<sub>3</sub>R” motif of mammalian PLD and “KX<sub>2</sub>K” motif of plant PLD $\beta/\gamma$ -are replaced respectively with “WDVMY (residues 418-422, shown with cyan sticks)” and “KQGG (residues 430-433, shown with magenta sticks)” in PLD $\alpha$ 1. The previously reported PI(4,5)P<sub>2</sub>-binding region 1(PBR1) is colored in green.
