# Supplementary material
Source: PubMed Central journal article supplement (PMC6951347)
Supplement: 41422_2019_244_MOESM12_ESM.pdf [file 41422_2019_244_MOESM12_ESM.pdf]

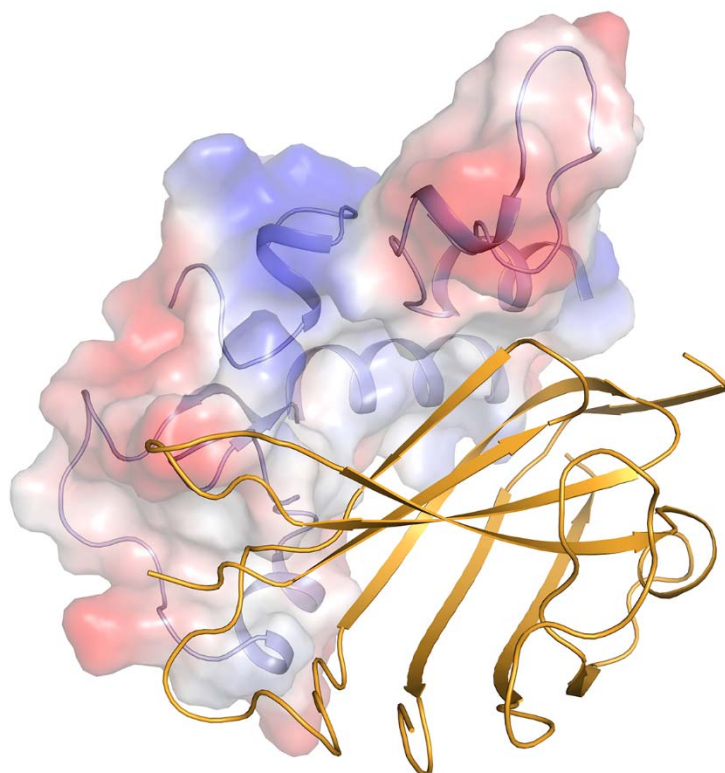

**Figure S12. Hydrophobic interaction surface between C2 domain and catalytic domain.**

C2 domain is shown with ribbon cartoon colored in bright orange, and part of the catalytic domain is shown with electron static surface model for clarity. Red color and blue color indicate the negative and positive charges.
