# Supplementary material
Source: PubMed Central journal article supplement (PMC6951347)
Supplement: 41422_2019_244_MOESM13_ESM.pdf [file 41422_2019_244_MOESM13_ESM.pdf]

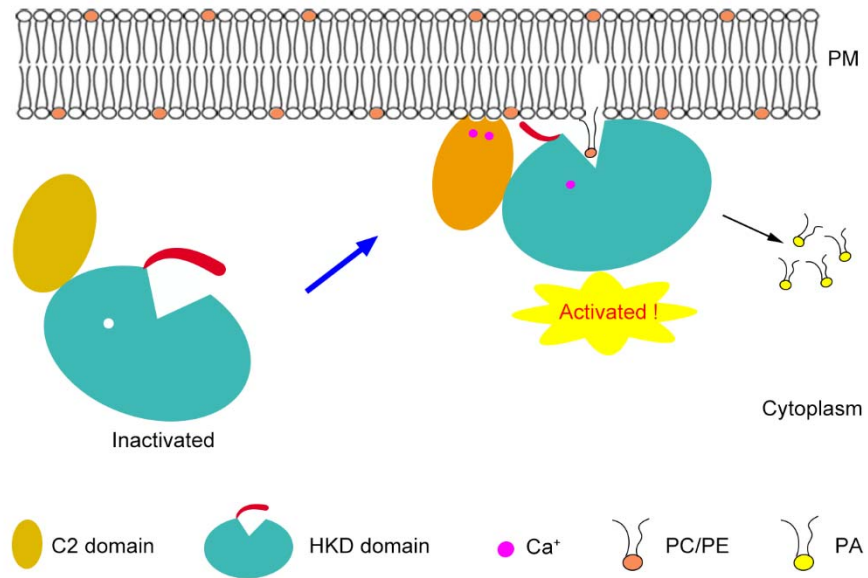

**Figure S13. A simplified functional model of C2-PLD.** In the inactive state, the lid of the substrate-binding pocket of C2-PLD adopts a closed conformation to seal the pocket; when C2-PLD attaches to the membrane and the Ca<sup>2+</sup> binds, the lid opens up to allow the membrane lipids entering into the pocket.
