# Supplementary material
Source: PubMed Central journal article supplement (PMC6951347)
Supplement: 41422_2019_244_MOESM14_ESM.pdf [file 41422_2019_244_MOESM14_ESM.pdf]

**Table S1. Data collection and structure refinement statistics**

|                                                                      | PLD $\alpha$ 1-PA                              | PLD $\alpha$ 1-Apo       | Se-Met                                         |
|----------------------------------------------------------------------|------------------------------------------------|--------------------------|------------------------------------------------|
| Resolution (Å)                                                       | 34.7-2.30<br>(2.37-2.30)                       | 37.7-1.80<br>(1.87-1.80) | 38.7-2.00<br>(2.07-2.00)                       |
| Space group                                                          | P 2 <sub>1</sub> 2 <sub>1</sub> 2 <sub>1</sub> | C 1 2 1                  | P 2 <sub>1</sub> 2 <sub>1</sub> 2 <sub>1</sub> |
| Until cell                                                           |                                                |                          |                                                |
| <i>a</i> , <i>b</i> , <i>c</i> , (Å)                                 | 99.04,123.03<br>138.90                         | 118.89 127.44<br>55.36   | 99.23 123.57<br>140.22                         |
| $\alpha$ , $\beta$ , $\gamma$ , (°)                                  | 90, 90, 90                                     | 90 95.472 90             | 90, 90, 90                                     |
| Unique reflections                                                   | 74,502 (6,209) <sup>†</sup>                    | 75,085 (7,370)           | 117,128 (11,282)                               |
| Multiplicity                                                         | 12.6                                           | 13.4                     | 13.2                                           |
| I/ $\sigma$ (I)                                                      | 13.1 (2.3)                                     | 27.6 (1.4)               | 21.6 (1.4)                                     |
| <i>R</i> <sub>merge</sub>                                            | 0.219 (1.145)                                  | 0.096 (0.798)            | 0.125 (0.872)                                  |
| Completeness (%)                                                     | 99.8 (98.3)                                    | 99.5 (99.9)              | 100 (100)                                      |
| <i>R</i> <sub>work</sub> / <i>R</i> <sub>free</sub> <sup>‡</sup> (%) | 19.70/24.99                                    | 16.64/19.23              |                                                |
| Number of atoms                                                      | 6,298 <sup>A</sup> /6,298 <sup>B</sup>         | 6,199                    |                                                |
| Ligand                                                               |                                                |                          |                                                |
| di8:0PA                                                              | 28/28                                          |                          |                                                |
| Ca <sup>2+</sup>                                                     | 2                                              | 1                        |                                                |
| Water                                                                | 500                                            | 595                      |                                                |
| Protein residues                                                     | 1572                                           | 771                      |                                                |
| r.m.s. deviations                                                    |                                                |                          |                                                |
| bonds (Å)                                                            | 0.010                                          | 0.007                    |                                                |
| Angles (°)                                                           | 1.12                                           | 0.89                     |                                                |
| Average B factor                                                     | 15.9                                           | 21.6                     |                                                |
| Protein                                                              | 15.9                                           | 20.8                     |                                                |
| Ligand                                                               | 15.8                                           | 13.5                     |                                                |
| Water                                                                | 15.1                                           | 30.3                     |                                                |
| Ramachandran                                                         |                                                |                          |                                                |
| Favored (%)                                                          | 93.3                                           | 95.9                     |                                                |
| Allowed (%)                                                          | 6.7                                            | 4.1                      |                                                |

<sup>†</sup> Numbers in parentheses represent the highest-resolution shell.

<sup>‡</sup>  $R = \frac{\sum hkl ||F_o| - |F_c||}{\sum hkl |F_o|}$ .

<sup>A</sup> Chain A; <sup>B</sup> Chain B.
