# Supplementary material
Source: PubMed Central journal article supplement (PMC6951347)

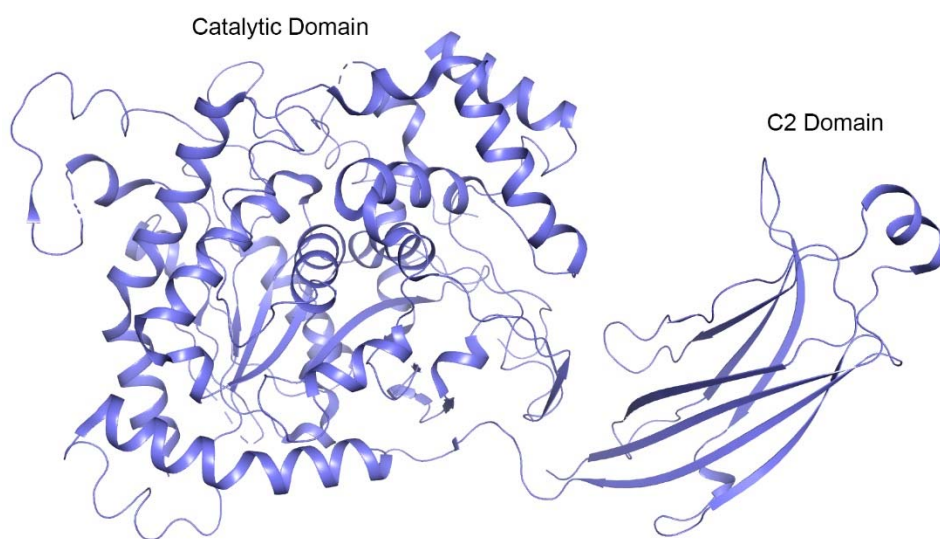

**Figure S3. Structure of human cPLA2 (PDB ID: 1CJY)**

Supplement: 41422_2019_244_MOESM3_ESM.pdf [file 41422_2019_244_MOESM3_ESM.pdf]

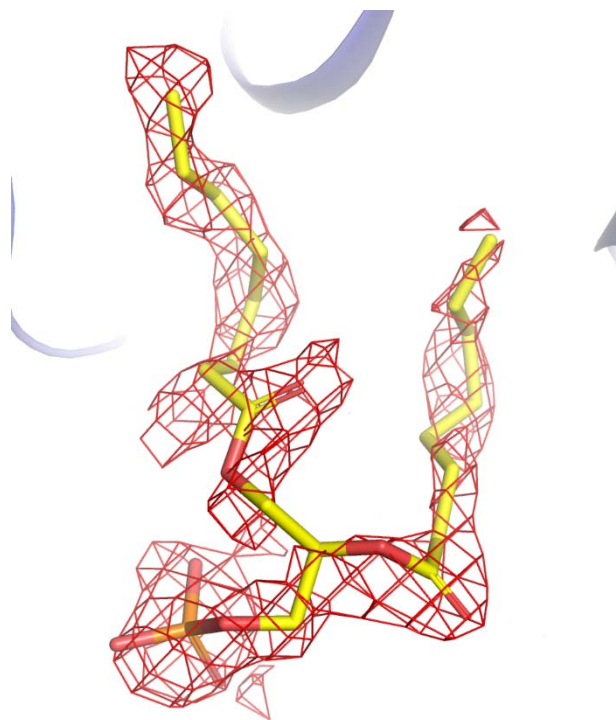

**Figure S4. Electron density of di8:0-PA contoured at  $0.8\sigma$ .**

Supplement: 41422_2019_244_MOESM4_ESM.pdf [file 41422_2019_244_MOESM4_ESM.pdf]
